# Supplementary figures and images for: LncTx: A network-based method to repurpose drugs acting on the survival-related lncRNAs in lung cancer
Source: PubMed Central journal article supplement — Comput Struct Biotechnol J. 2021 Jul 10;19:3990–4002. doi: 10.1016/j.csbj.2021.07.007 (PMC8319574; doi:10.1016/j.csbj.2021.07.007), 2021-07-10

ENSG00000230163

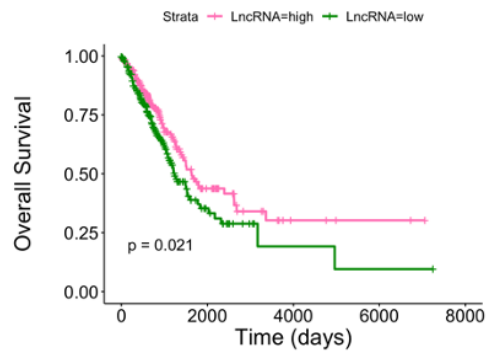

ENSG00000273226

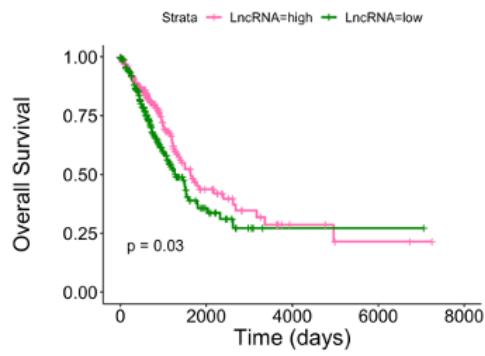

ENSG00000272402

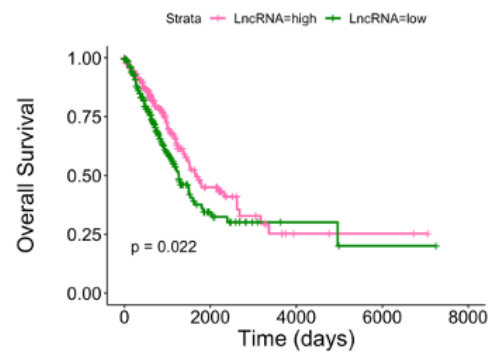

ENSG00000268650

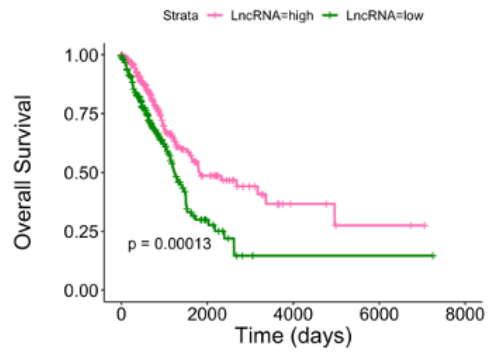

ENSG00000232611

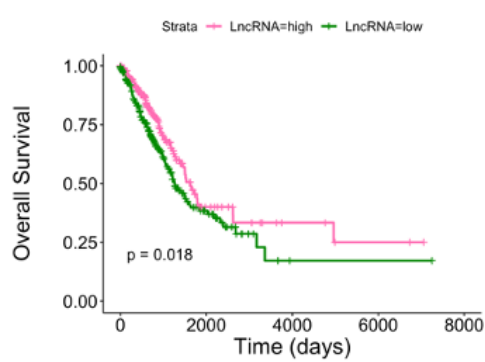

ENSG00000271828

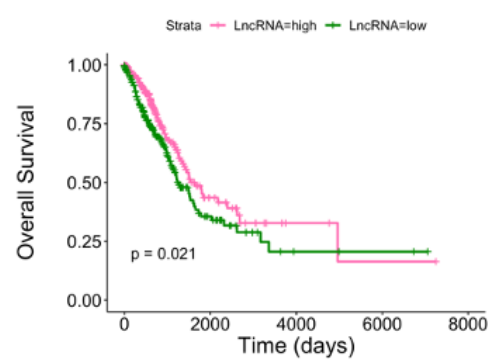

ENSG00000258365

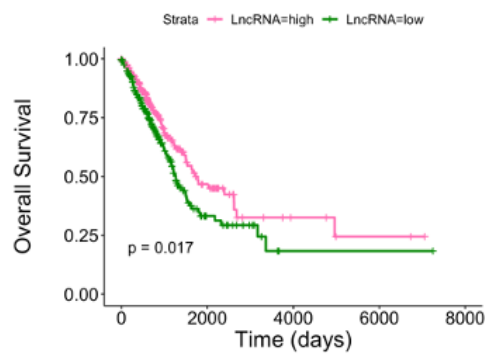

ENSG00000271646

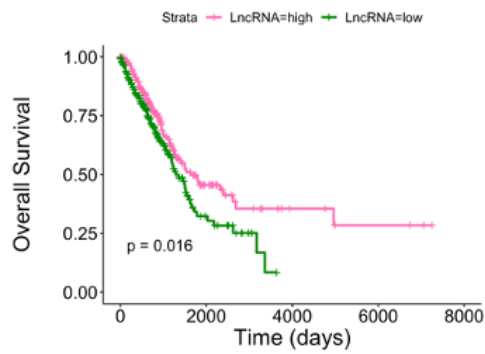

Supplement: mmc1.pdf [file mmc1.pdf]

**A**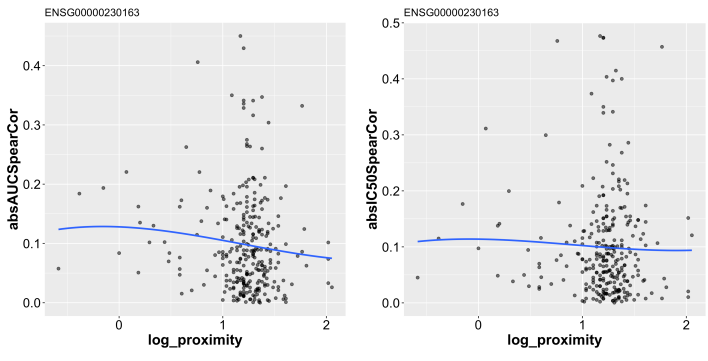**B**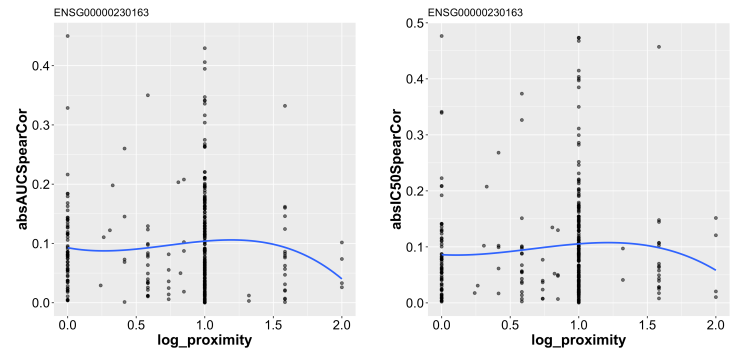**C**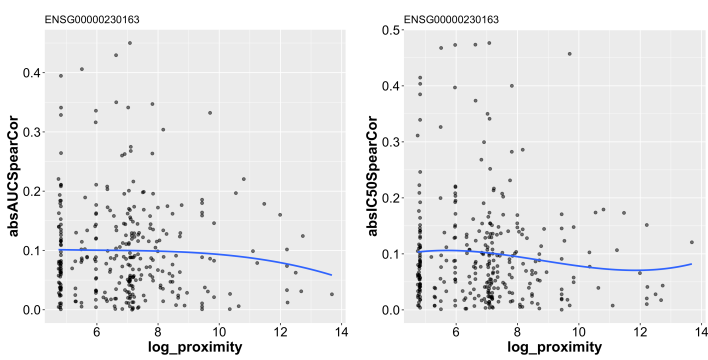**D**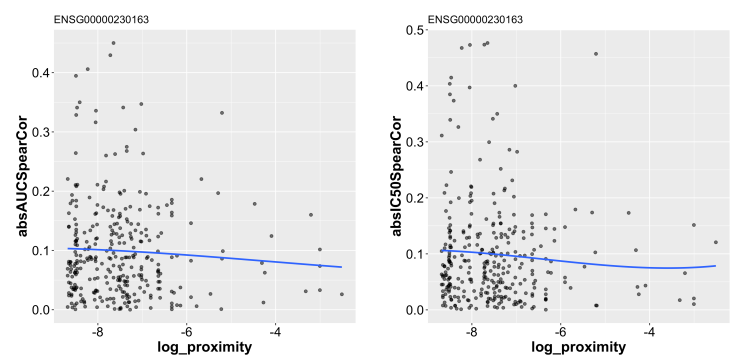**E**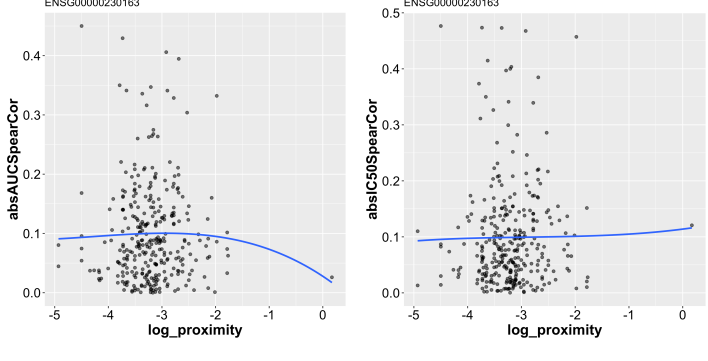**F**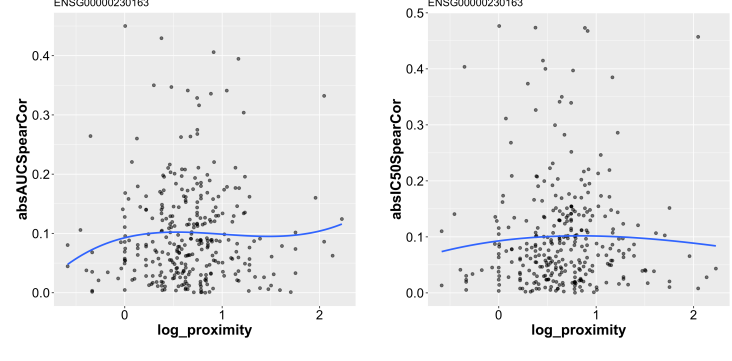**G**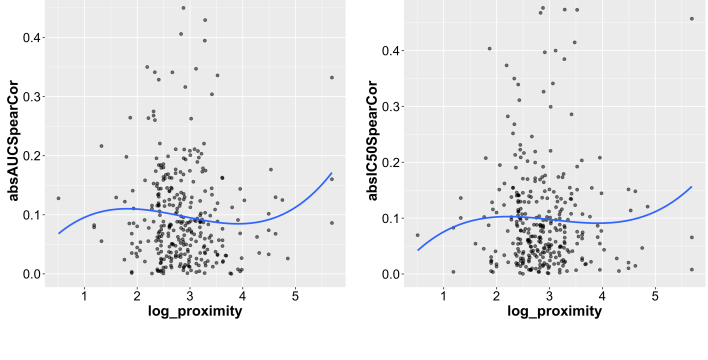

Supplement: mmc10.pdf [file mmc10.pdf]

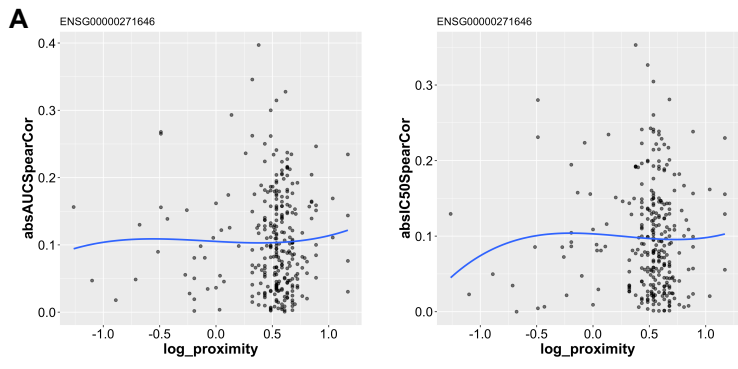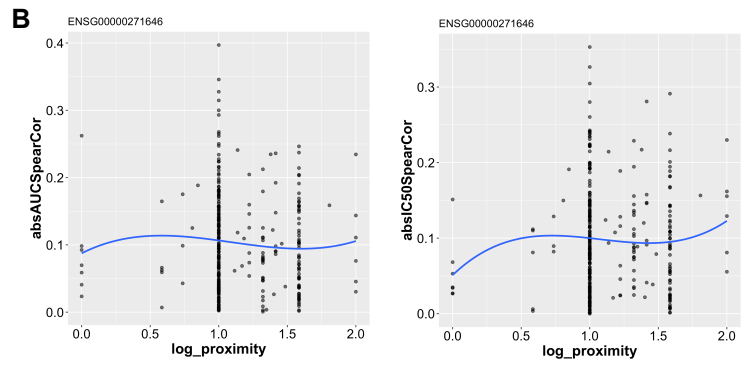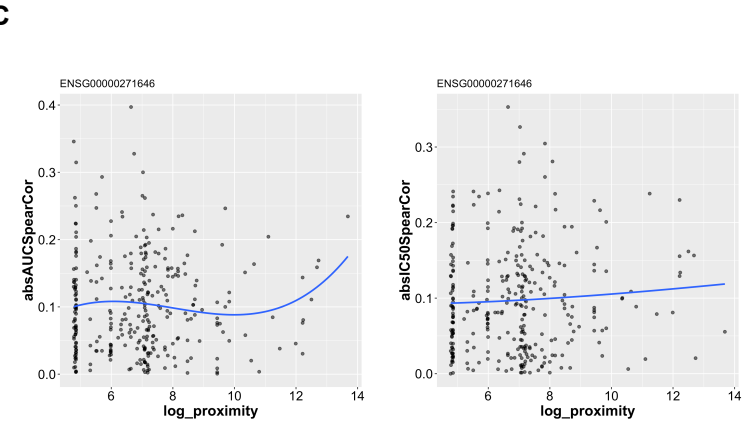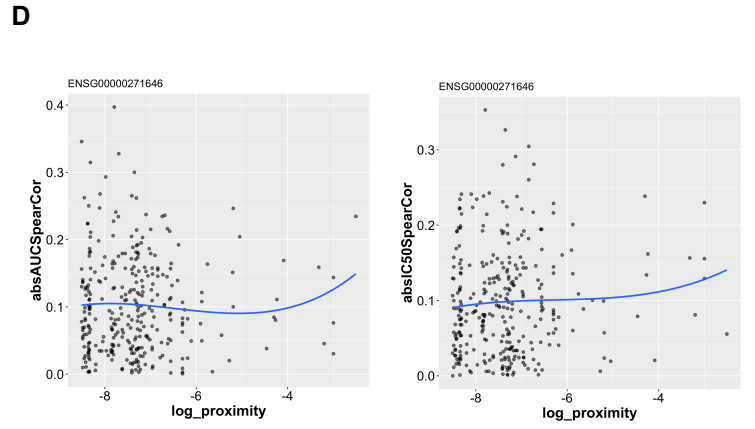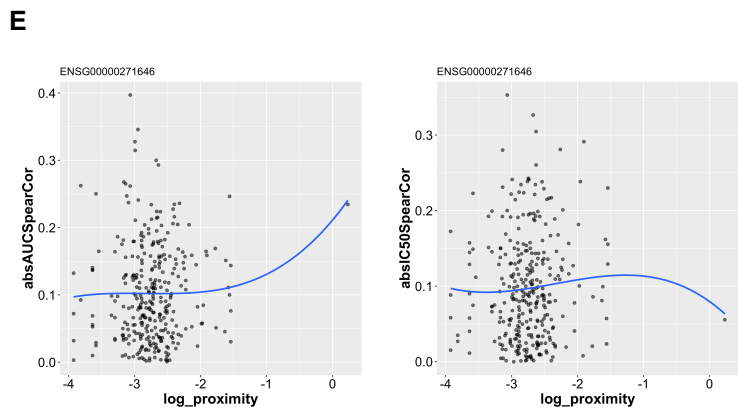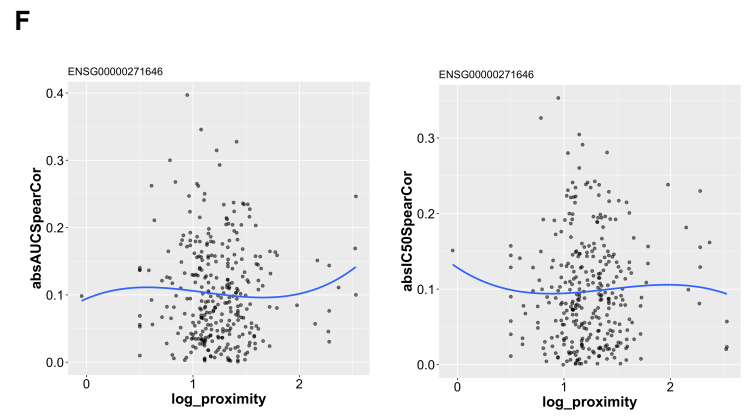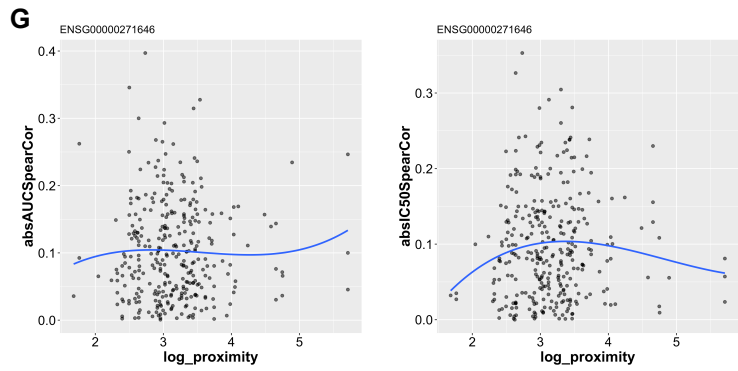

Supplement: mmc11.pdf [file mmc11.pdf]

**A**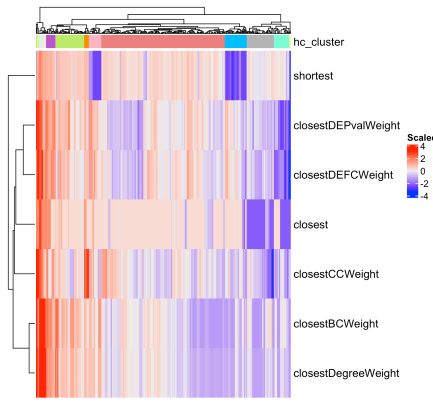**B**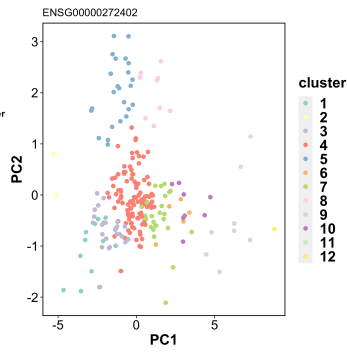**C**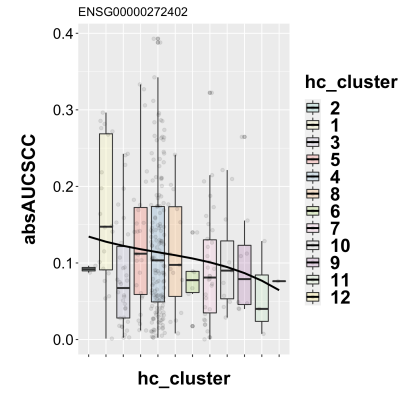**D**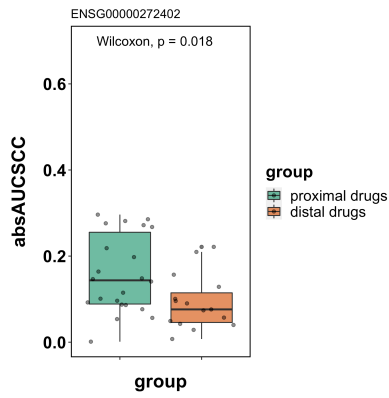**E**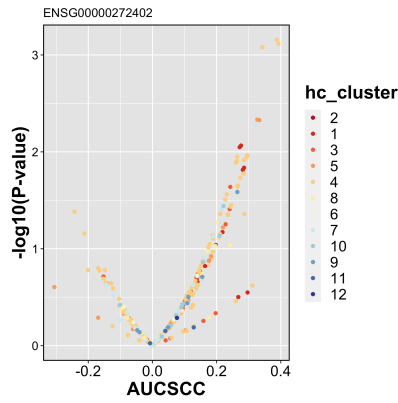**F**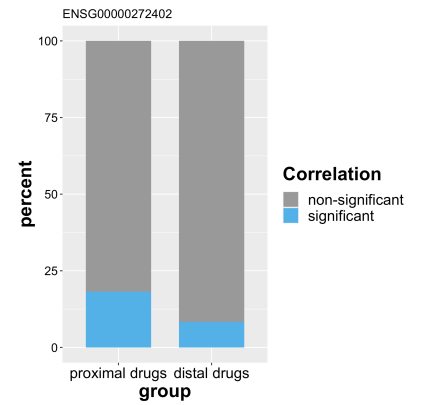**G**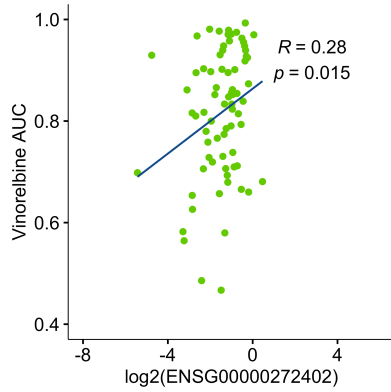**H**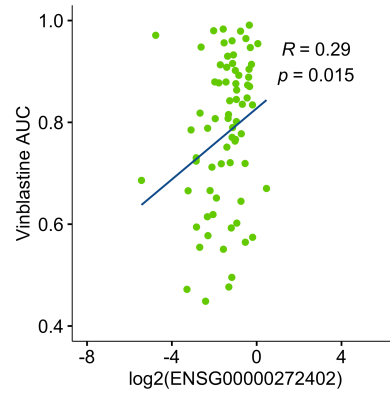**I**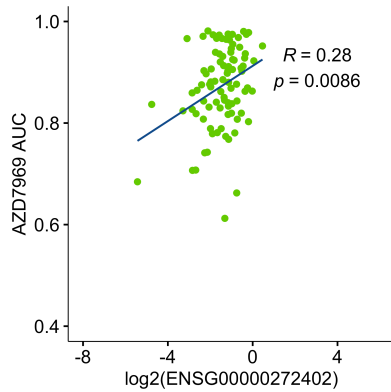**J**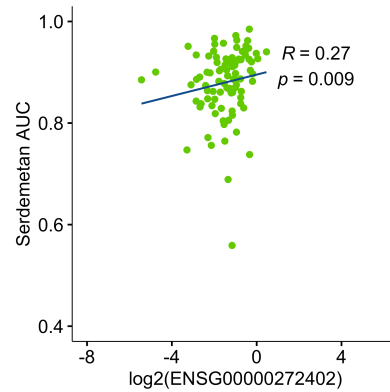

Supplement: mmc12.pdf [file mmc12.pdf]

**A**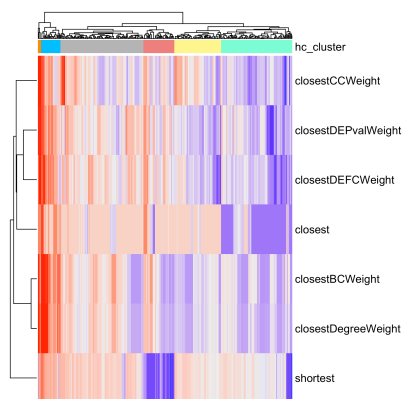**B**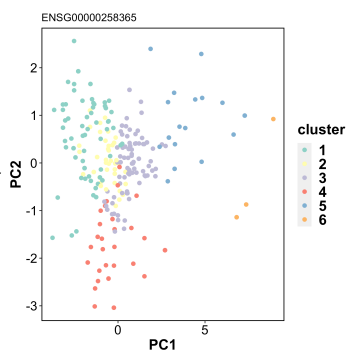**C**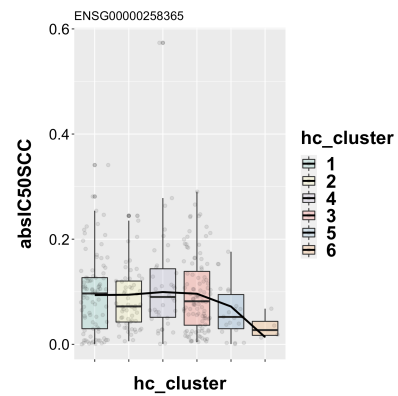**D**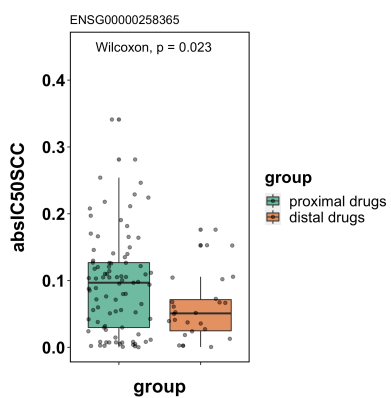**E**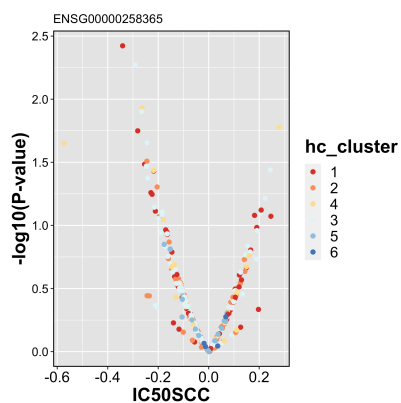**F**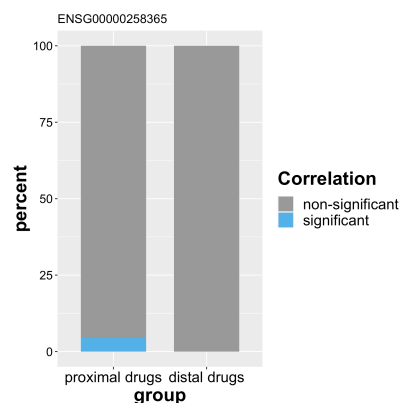

Supplement: mmc13.pdf [file mmc13.pdf]

**A**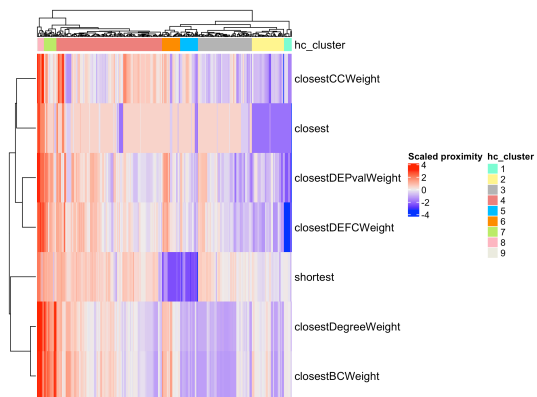**B**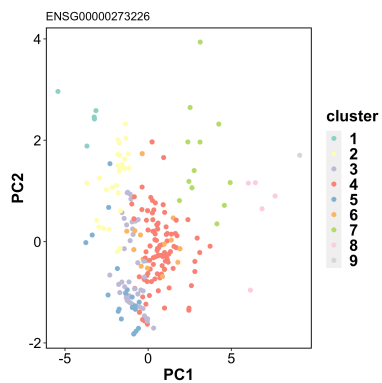**C**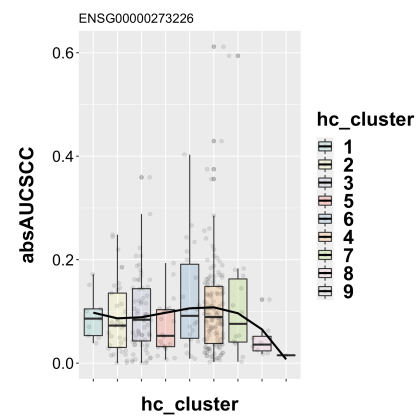**D**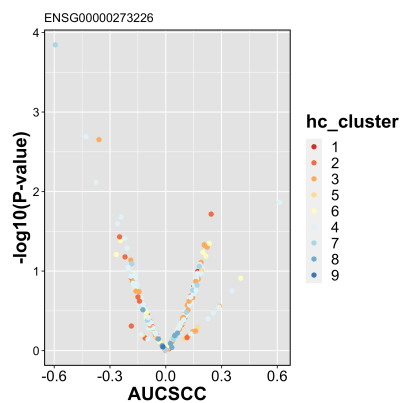**E**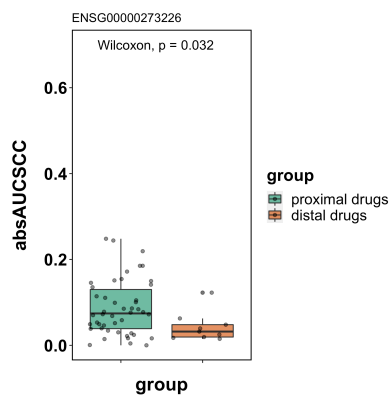**F**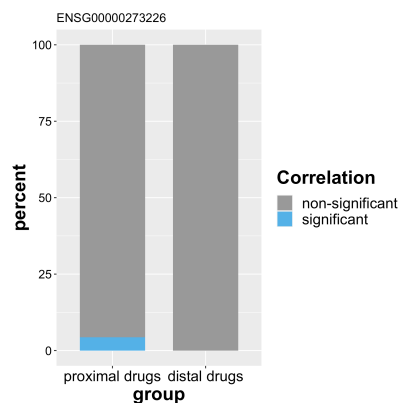

Supplement: mmc14.pdf [file mmc14.pdf]

**A**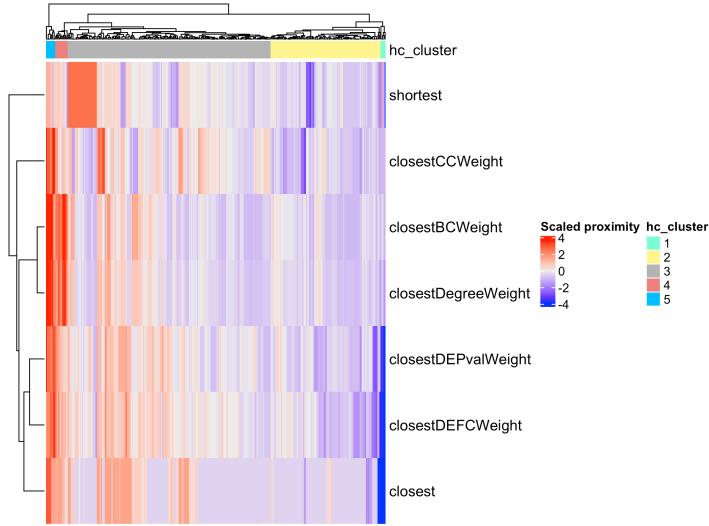**B**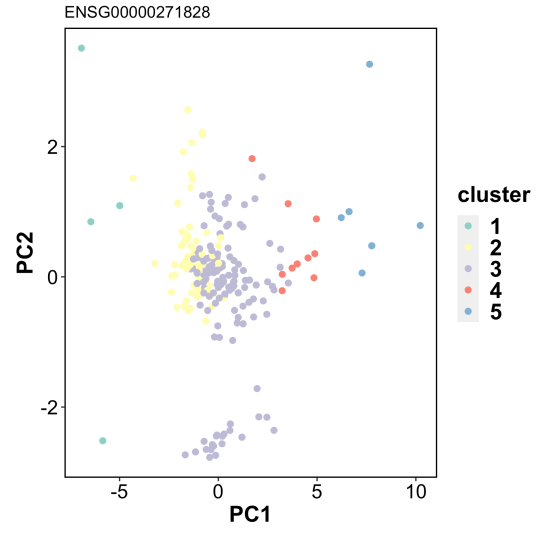**C**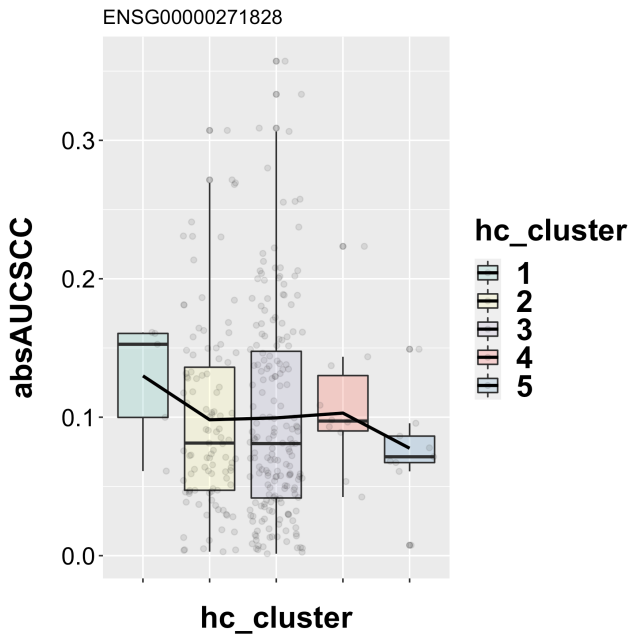**D**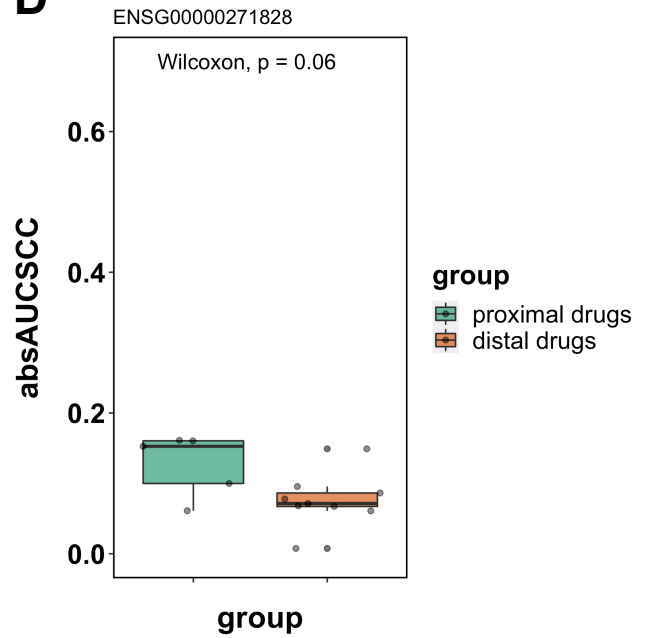**E**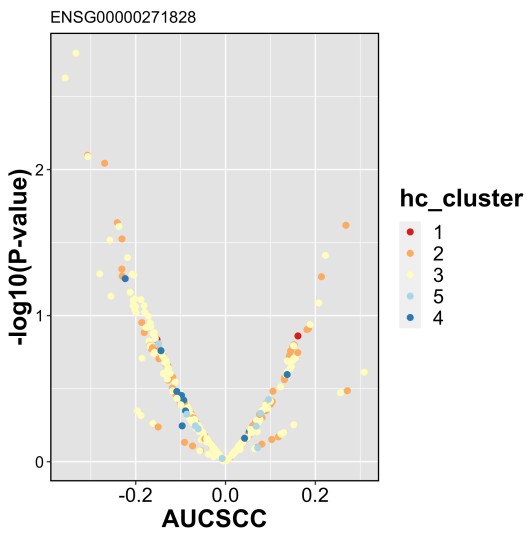

Supplement: mmc15.pdf [file mmc15.pdf]

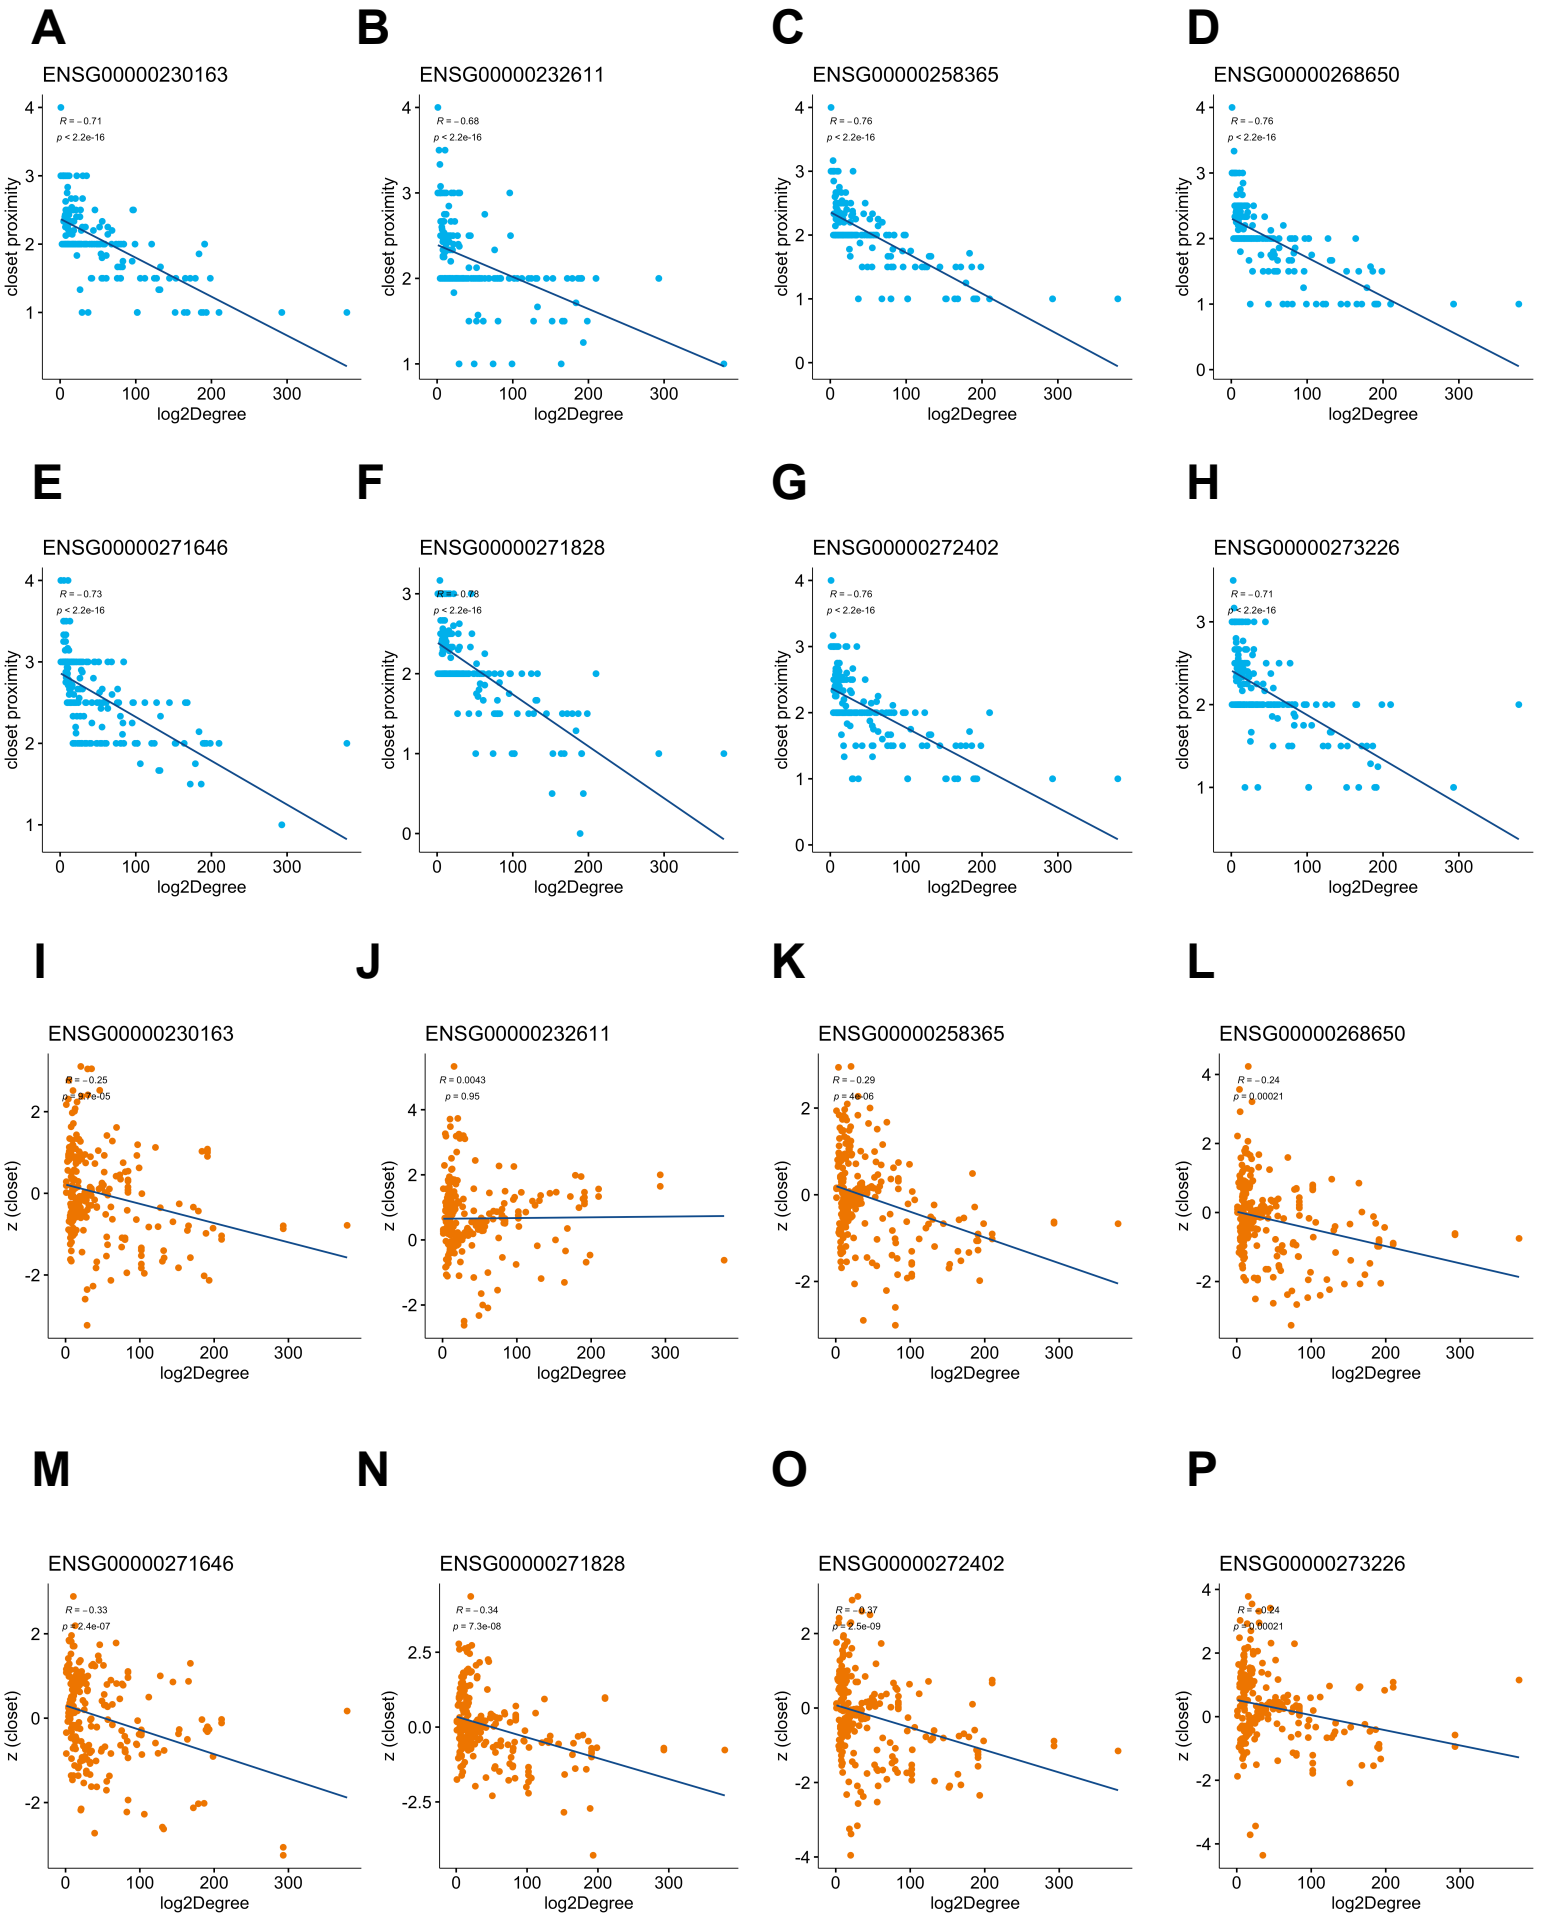

Supplement: mmc2.pdf [file mmc2.pdf]

**A**

ENSG00000232611

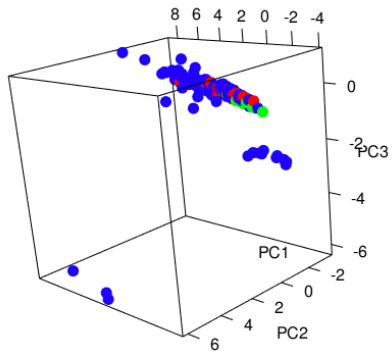**B**

ENSG00000271828

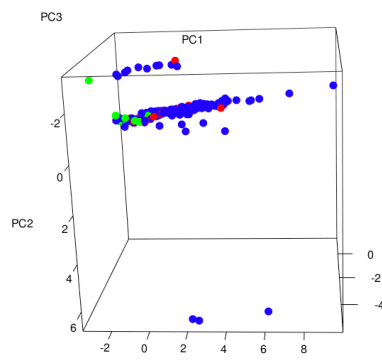**C**

ENSG00000268650

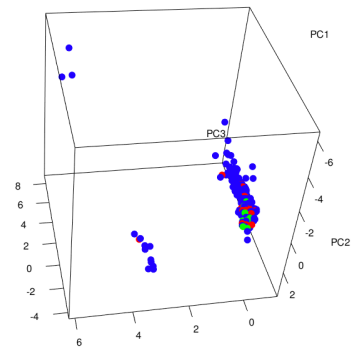**D**

ENSG00000258365

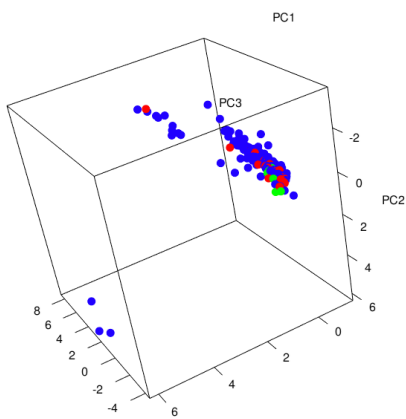**E**

ENSG00000272402

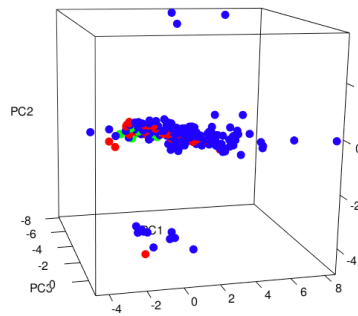**F**

ENSG00000230163

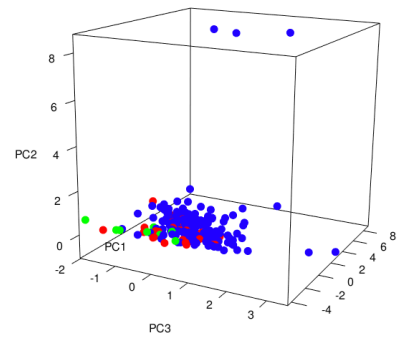**G**

ENSG00000273226

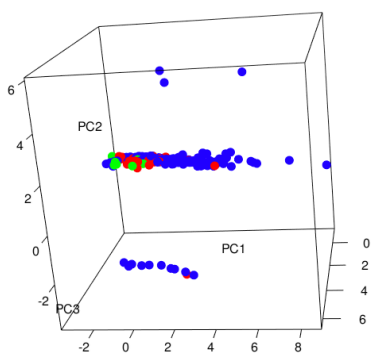**H**

ENSG00000271646

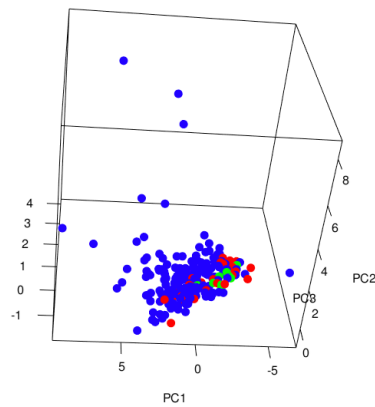

Supplement: mmc3.pdf [file mmc3.pdf]

**A**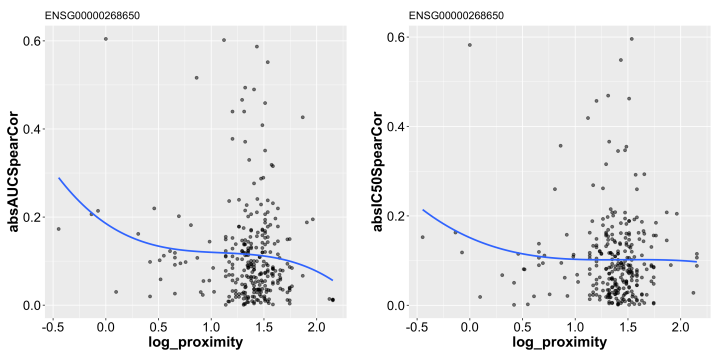**B**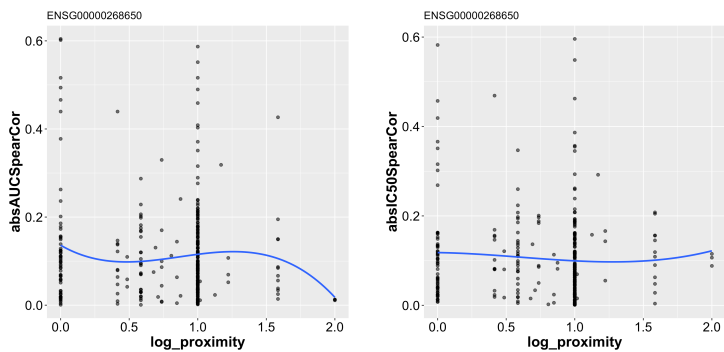**C**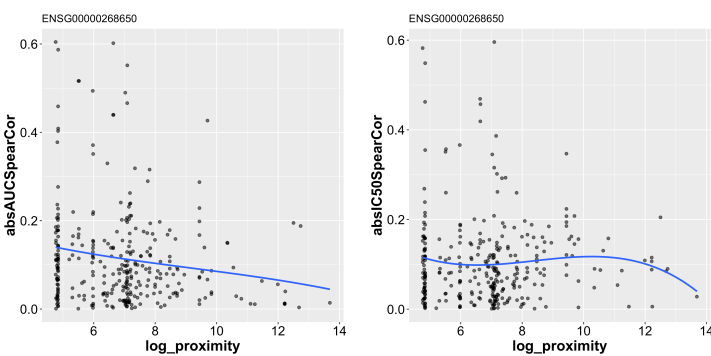**D**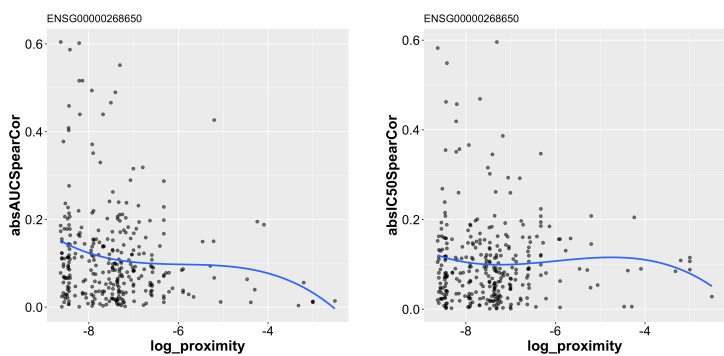**E**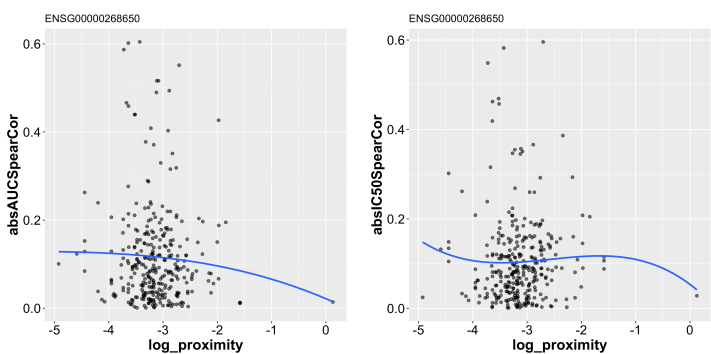**F**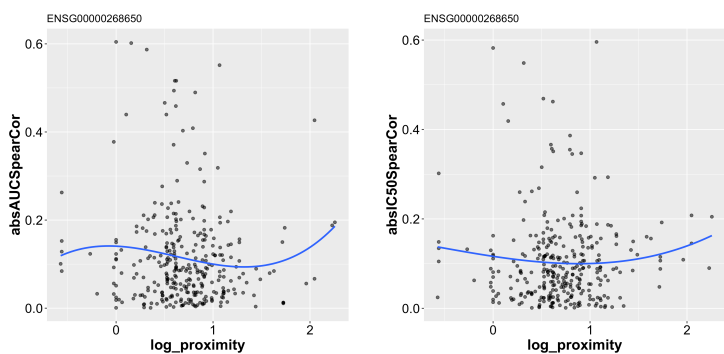**G**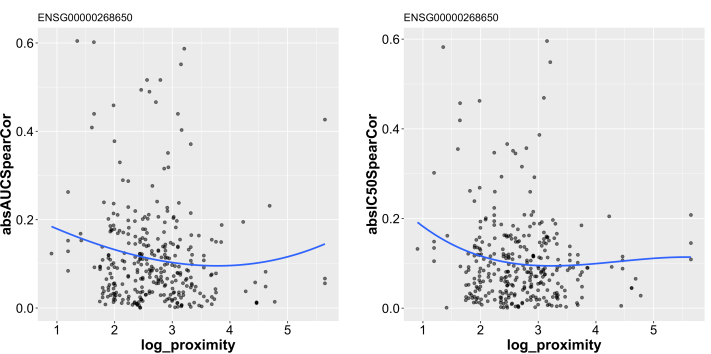

Supplement: mmc4.pdf [file mmc4.pdf]

**A**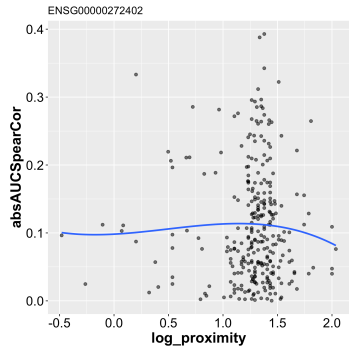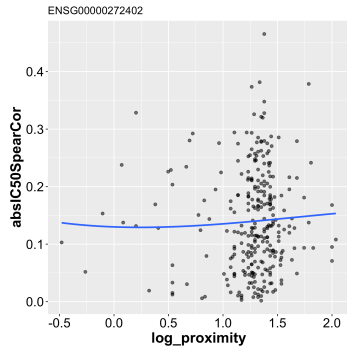**B**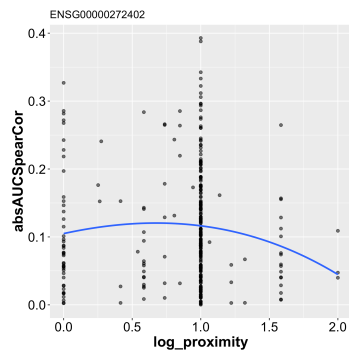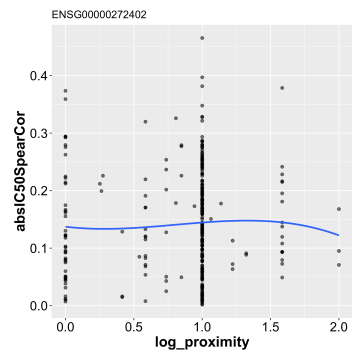**C**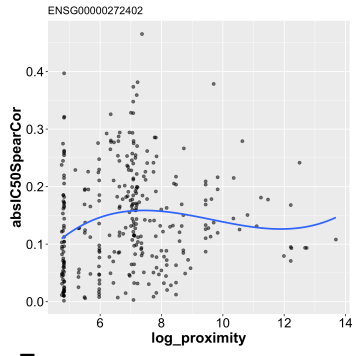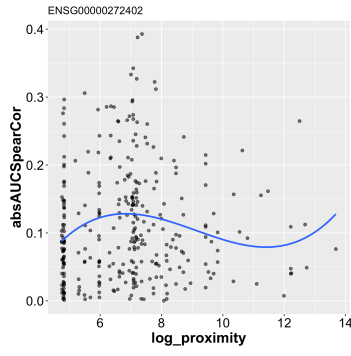**D**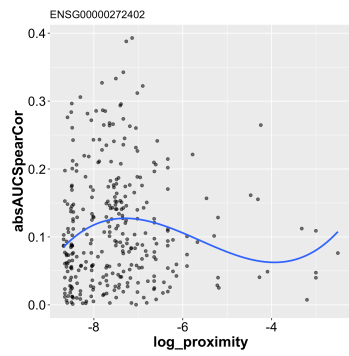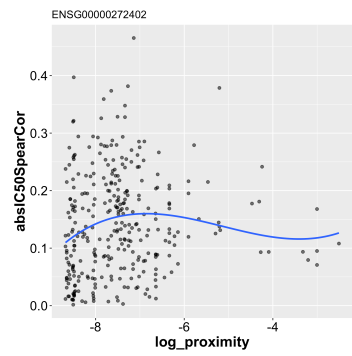**E**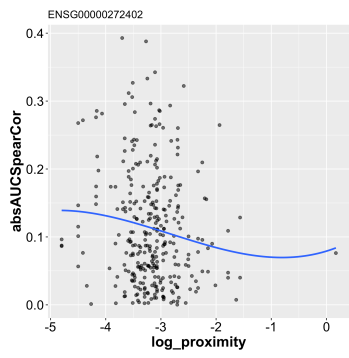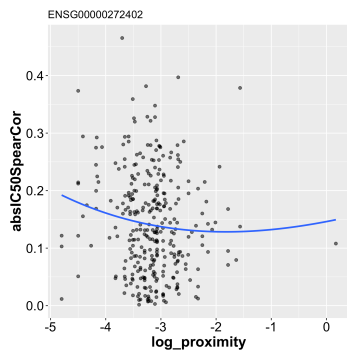**F**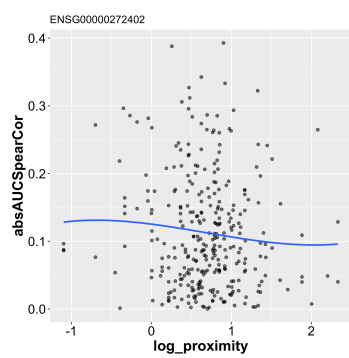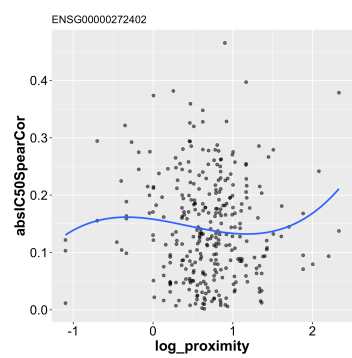**G**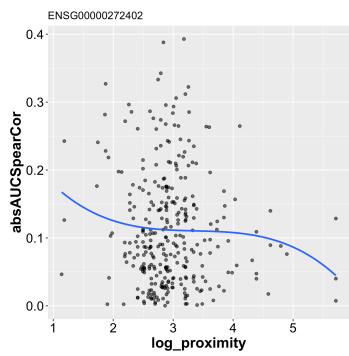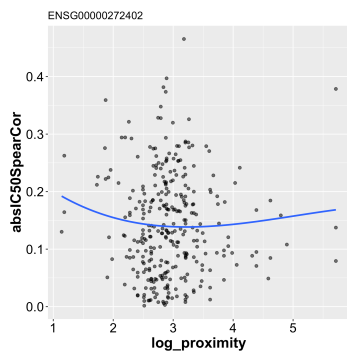

Supplement: mmc5.pdf [file mmc5.pdf]

**A**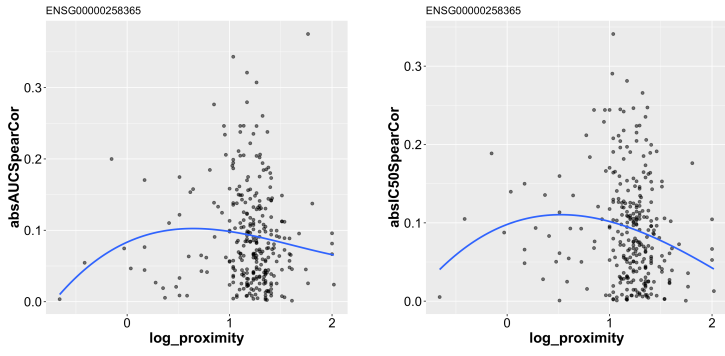**B**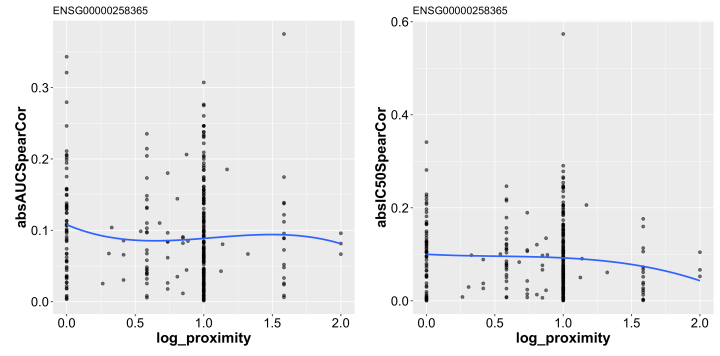**C**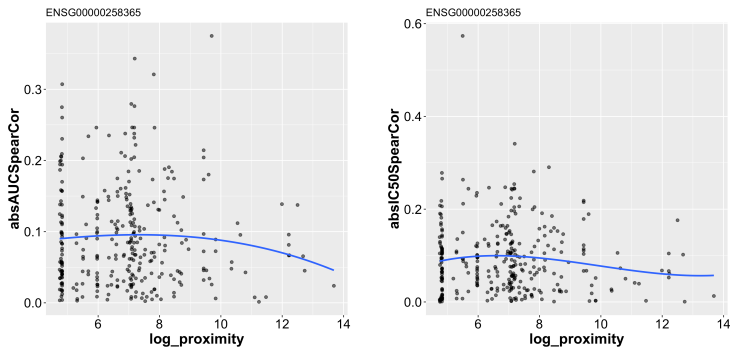**D**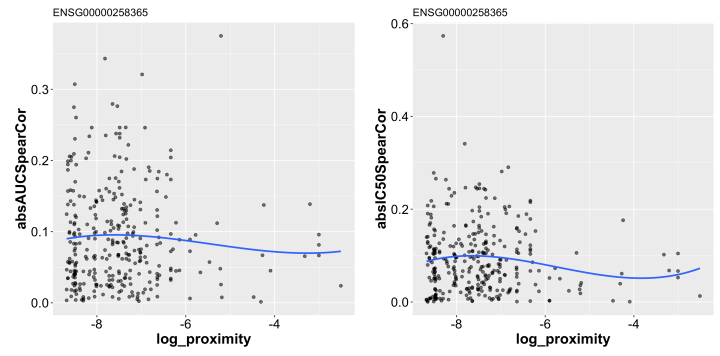**E**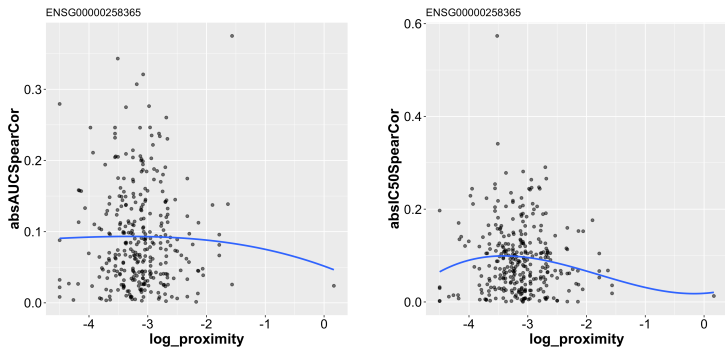**F**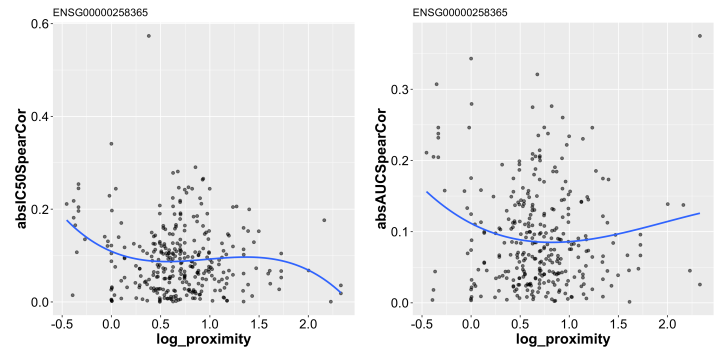**G**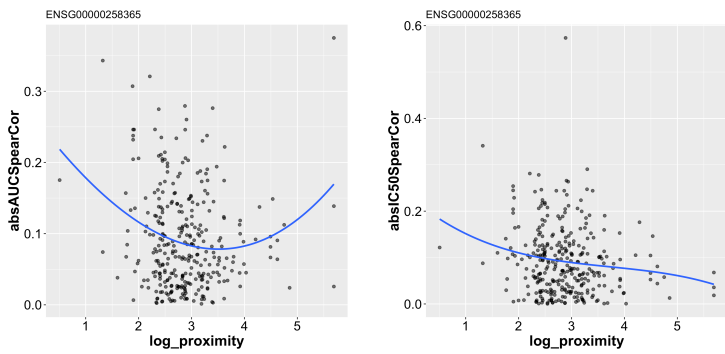

Supplement: mmc6.pdf [file mmc6.pdf]

**A**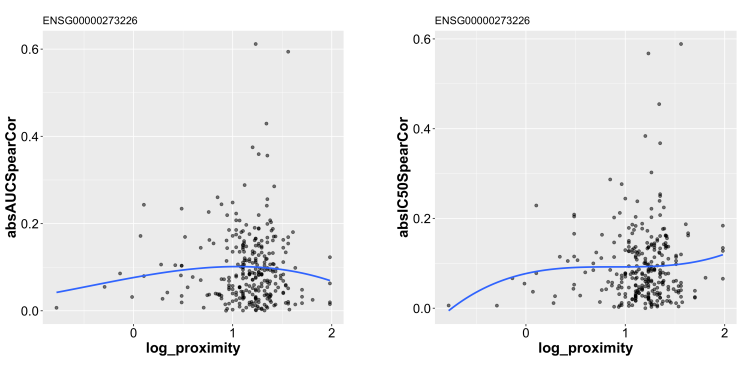**B**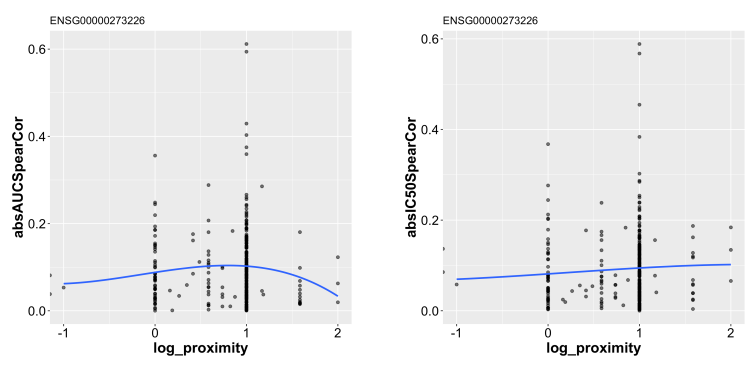**C**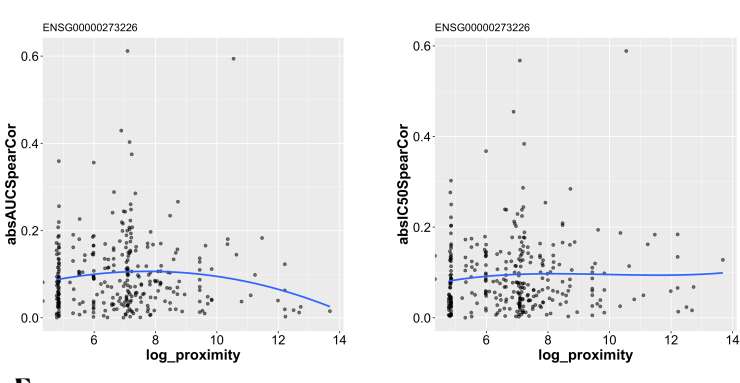**D**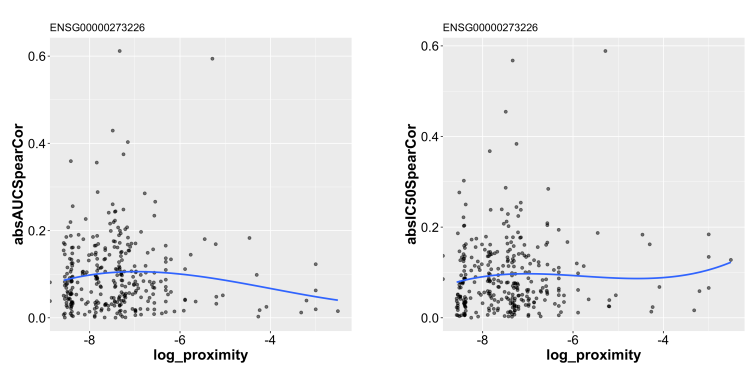**E**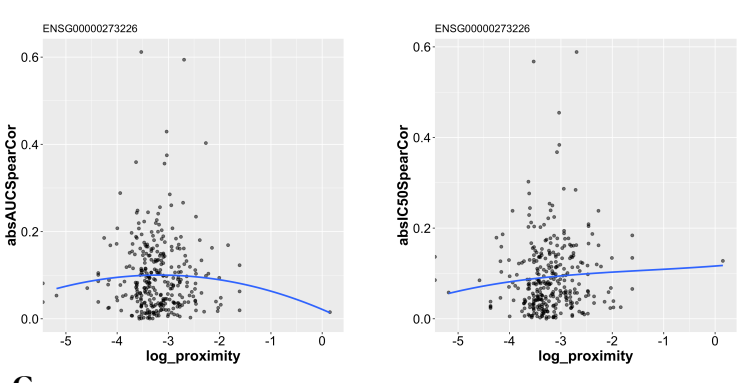**F**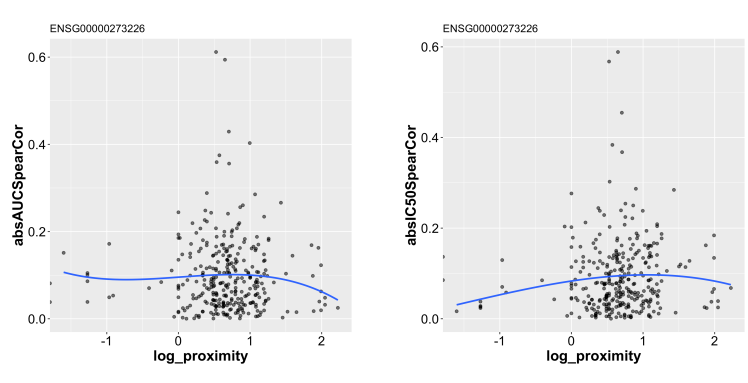**G**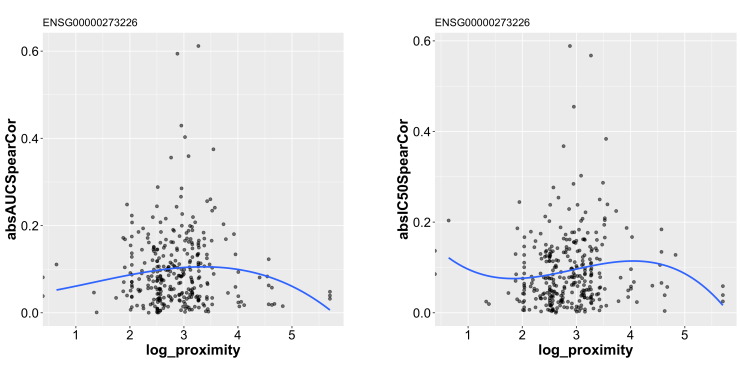

Supplement: mmc7.pdf [file mmc7.pdf]

**A**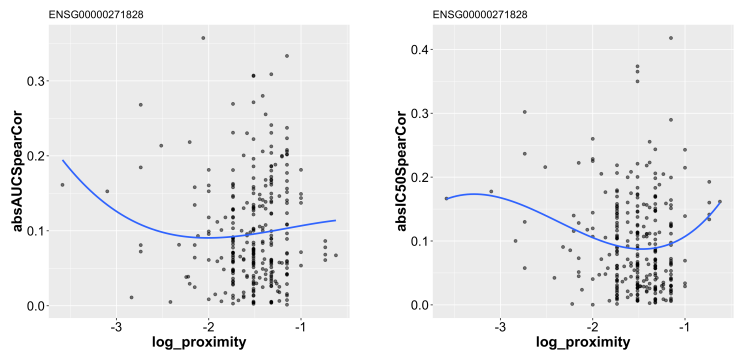**B**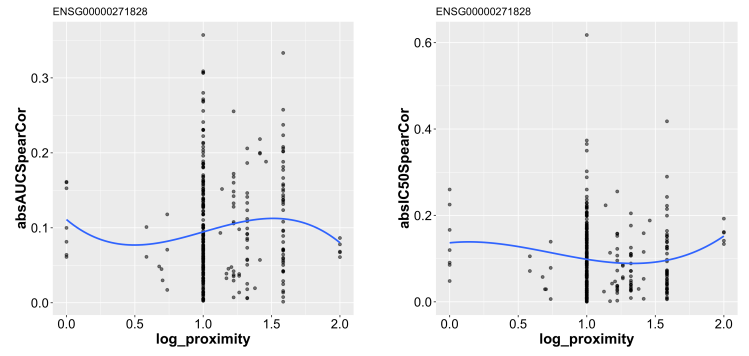**C**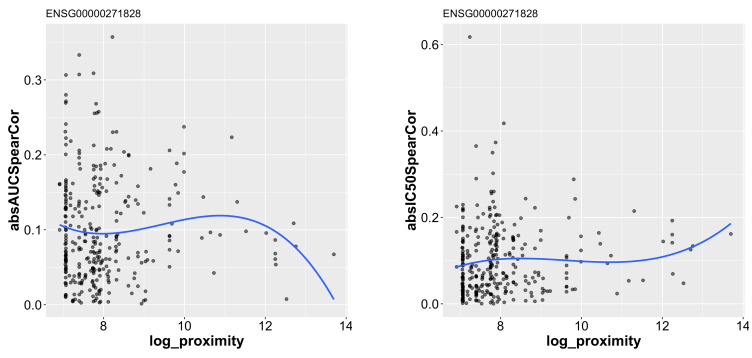**D**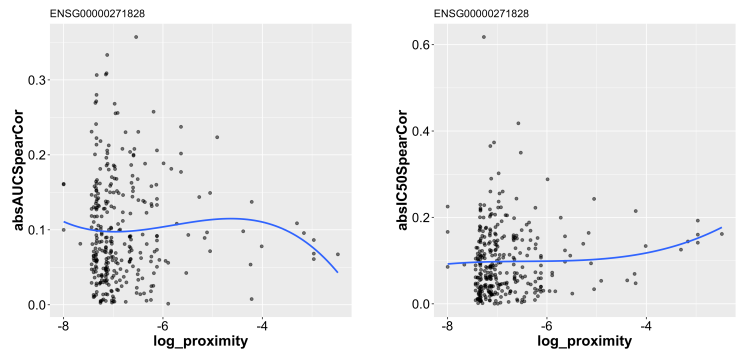**E**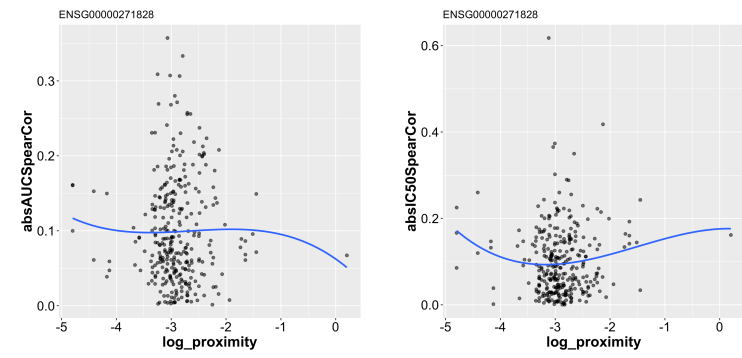**F**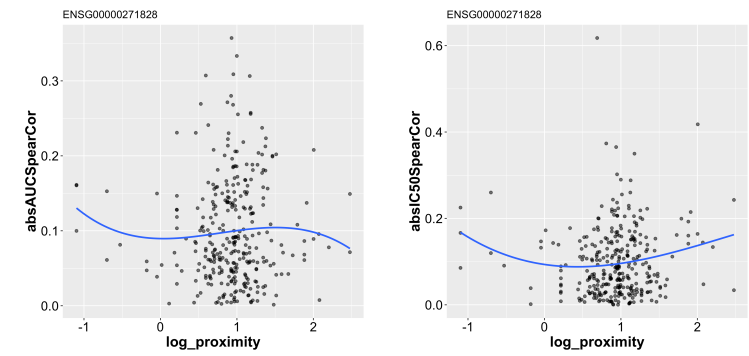**G**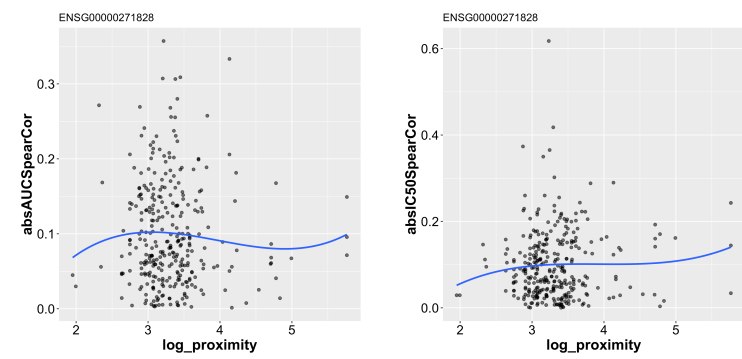

Supplement: mmc8.pdf [file mmc8.pdf]

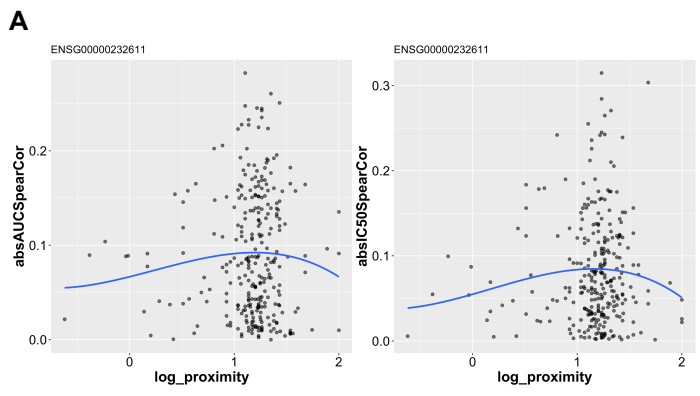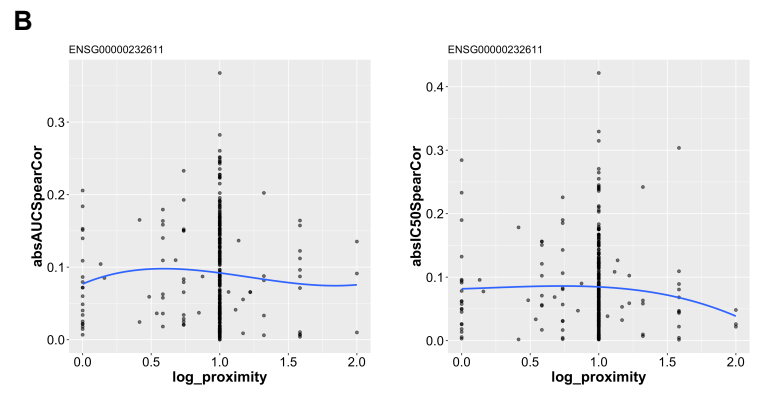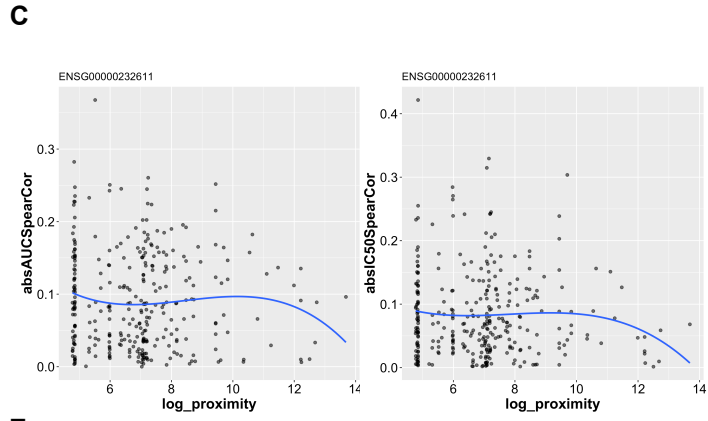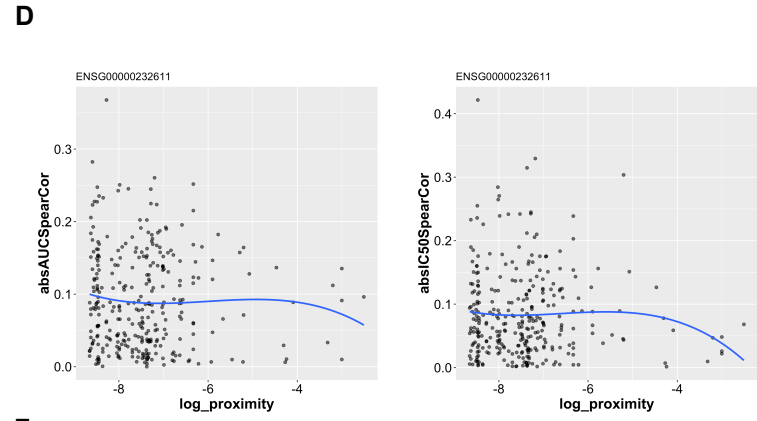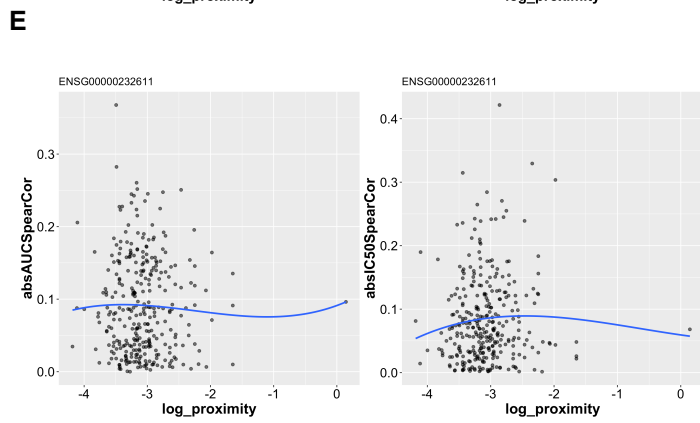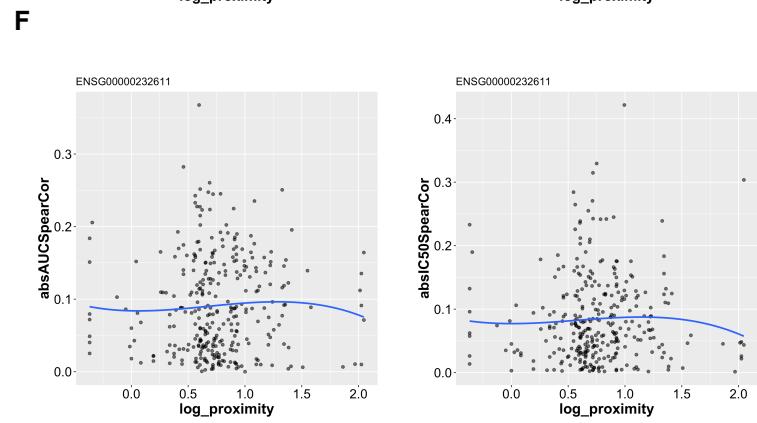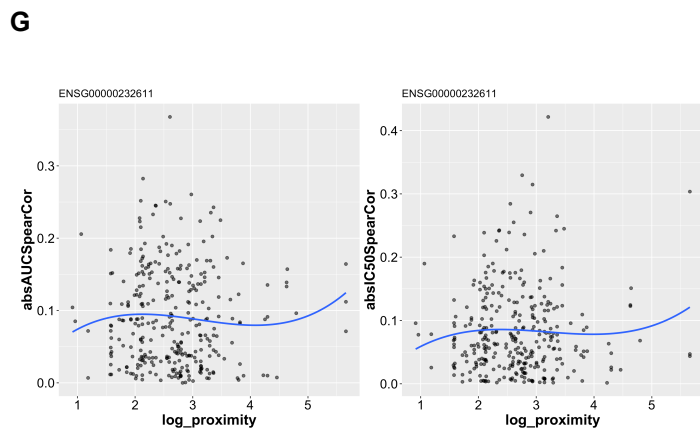

Supplement: mmc9.pdf [file mmc9.pdf]
